# Supplementary material
Source: PubMed Central journal article supplement (PMC4443751)
Supplement: NIHMS690743-supplement-1.pdf [file NIHMS690743-supplement-1.pdf]

# Supplementary Materials for “Pleiotropy Analysis of Quantitative Traits at Gene Level by Multivariate Functional Linear Models”

## Appendix A Information Of the Eight European Cohorts

For each of the eight European cohorts, we performed analysis for four lipid traits and 22 genes. The information of the 22 genes is given in Table S.1. The sample sizes of each trait are presented in Table S.2.

Table S.1: Summary of 22 Genes and the Number of Genetic Variants in Each Gene Region by Mar. 2006 (NCBI36/hg18). The number of variants is the number of genetic variants in a region of Start (-5Kb) – End (+5Kb) Positions. \* The gene region of *PCSK9* is (55277737, 55303114), and (55271537, 55286109) is the region in the database.

| Gene           | Chromosome Region | Gene Positions (bp)   | Start (-5Kb) – End (+5Kb) Positions | Number of Variants |
|----------------|-------------------|-----------------------|-------------------------------------|--------------------|
| <i>PCSK9</i> * | 1                 | 55277737 – 55303114   | 55271537 – 55286109                 | 74                 |
| <i>APOB</i>    | 2                 | 21077806 – 21120450   | 21072806 – 21125450                 | 223                |
| <i>IGF2BP2</i> | 3                 | 186844221 – 187025521 | 186839221 – 187030521               | 231                |
| <i>CDKAL1</i>  | 6                 | 20642667 – 21340613   | 20637667 – 21345613                 | 560                |
| <i>JAZF1</i>   | 7                 | 27836718 – 28186962   | 27831718 – 28191962                 | 384                |
| <i>LPL</i>     | 8                 | 19840862 – 19869050   | 19835862 – 19874050                 | 212                |
| <i>CDKN2B</i>  | 9                 | 21992902 – 21999312   | 21987902 – 22004312                 | 64                 |
| <i>CDC123</i>  | 10                | 12277971 – 12332593   | 12272971 – 12337593                 | 265                |
| <i>IDE</i>     | 10                | 94201421 – 94323832   | 94196421 – 94328832                 | 327                |
| <i>KIF11</i>   | 10                | 94342805 – 94405132   | 94337805 – 94410132                 | 216                |
| <i>HHEX</i>    | 10                | 94439661 – 94445388   | 94434661 – 94450388                 | 30                 |
| <i>TCF7L2</i>  | 10                | 114699999 – 114917426 | 114694999 – 114922426               | 258                |
| <i>KCNQ1</i>   | 11                | 2422797 – 2826916     | 2417797 – 2831916                   | 660                |
| <i>MTNR1B</i>  | 11                | 92342437 – 92355596   | 92337437 – 92360596                 | 106                |
| <i>HMGA2</i>   | 12                | 64504507 – 64646338   | 64499507 – 64651338                 | 214                |
| <i>TSPAN8</i>  | 12                | 69805144 – 69838046   | 69800144 – 69843046                 | 54                 |
| <i>HNF1A</i>   | 12                | 119900932 – 119924697 | 119895932 – 119929697               | 71                 |
| <i>OASL</i>    | 12                | 119942478 – 119961428 | 119937478 – 119966428               | 108                |
| <i>FTO</i>     | 16                | 52295376 – 52705882   | 52290376 – 52710882                 | 191                |
| <i>LDLR</i>    | 19                | 11061038 – 11105505   | 11056038 – 11110505                 | 43                 |
| <i>APOE</i>    | 19                | 50100879 – 50104490   | 50095879 – 50109490                 | 35                 |
| <i>GIPR</i>    | 19                | 50863342 – 50877557   | 50858342 – 50882557                 | 37                 |

Table S.2: Sample Sizes of the Four Lipid Traits for Each of the Seven Studies.

| Study                     | HDL  | LDL  | TG   | CHOL |
|---------------------------|------|------|------|------|
| <b>D2d-2007</b>           | 2075 | 2074 | 2075 | 2075 |
| <b>DIAGEN</b>             | 1470 | 1454 | 1470 | 1471 |
| <b>DPS</b>                | 412  | 410  | 412  | 412  |
| <b>DRs EXTRA</b>          | 1157 | 1157 | 1157 | 1157 |
| <b>FUSION<br/>Stage 2</b> | 2496 | 1892 | 2062 | 2500 |
| <b>METSIM</b>             | 1346 | 1345 | 1346 | 1346 |
| <b>Norway</b>             | 2484 | 2320 | 2487 | 2476 |

## Appendix B Simulation Results

In this section of the **Supplementary Materials**, more empirical power results are presented based on the approximate  $F$ -distribution tests of Pillai-Bartlett trace. In the Figures S.1, S.2, S.3, and S.4, all causal variants had positive effects for the trait  $y_1$ . In the Figures S.5, S.6, S.7, and S.8, 50%/50% causal variants had negative/positive effects for the trait  $y_1$ .

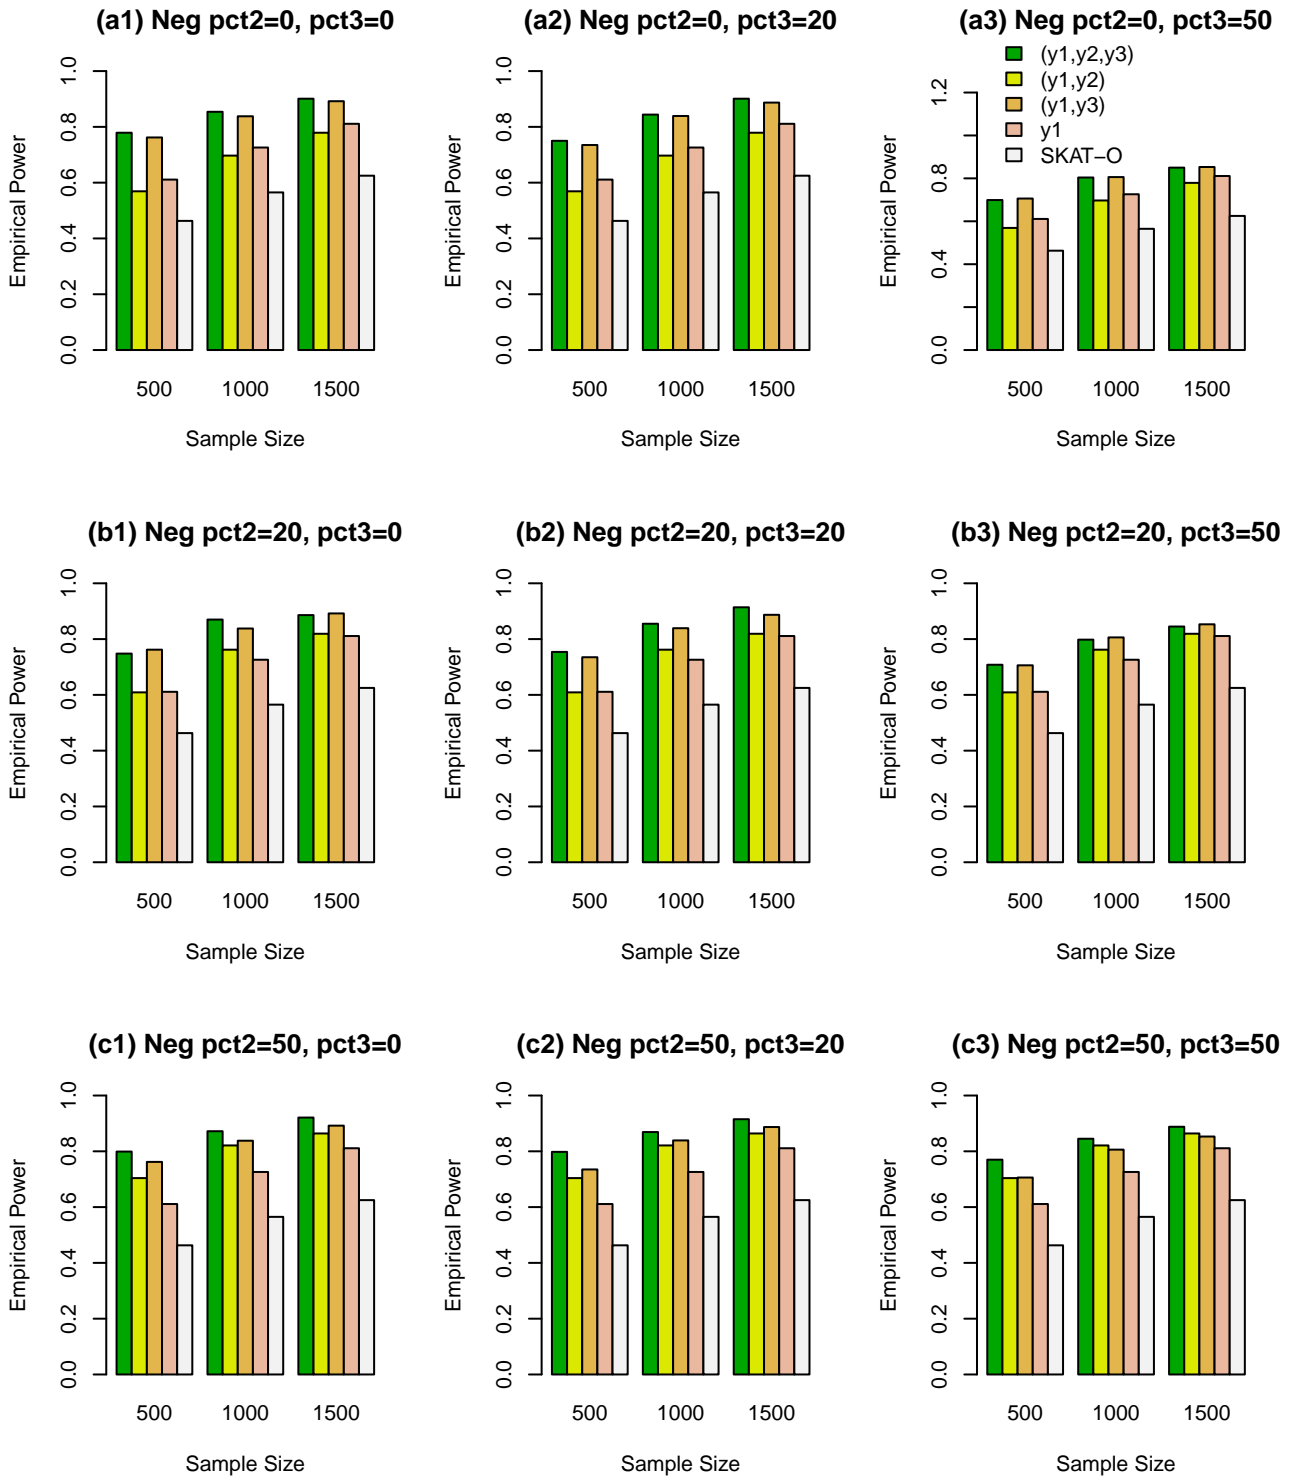

Figure S.1: The Empirical Power of the Approximate  $F$ -distribution Test of Model (3) Using B-spline Basis Based on Pillai-Bartlett Trace and SKAT-O at  $\alpha = 0.01$ , When Causal Variants Were Only Rare and 10% of the Variants Were Causal. For the trait  $y_1$ , all causal variants had positive effects; pct2 represents the percentage of negative effect causal variants for trait  $y_2$ ; and pct3 represents the percentage of negative effect causal variants for trait  $y_3$ .

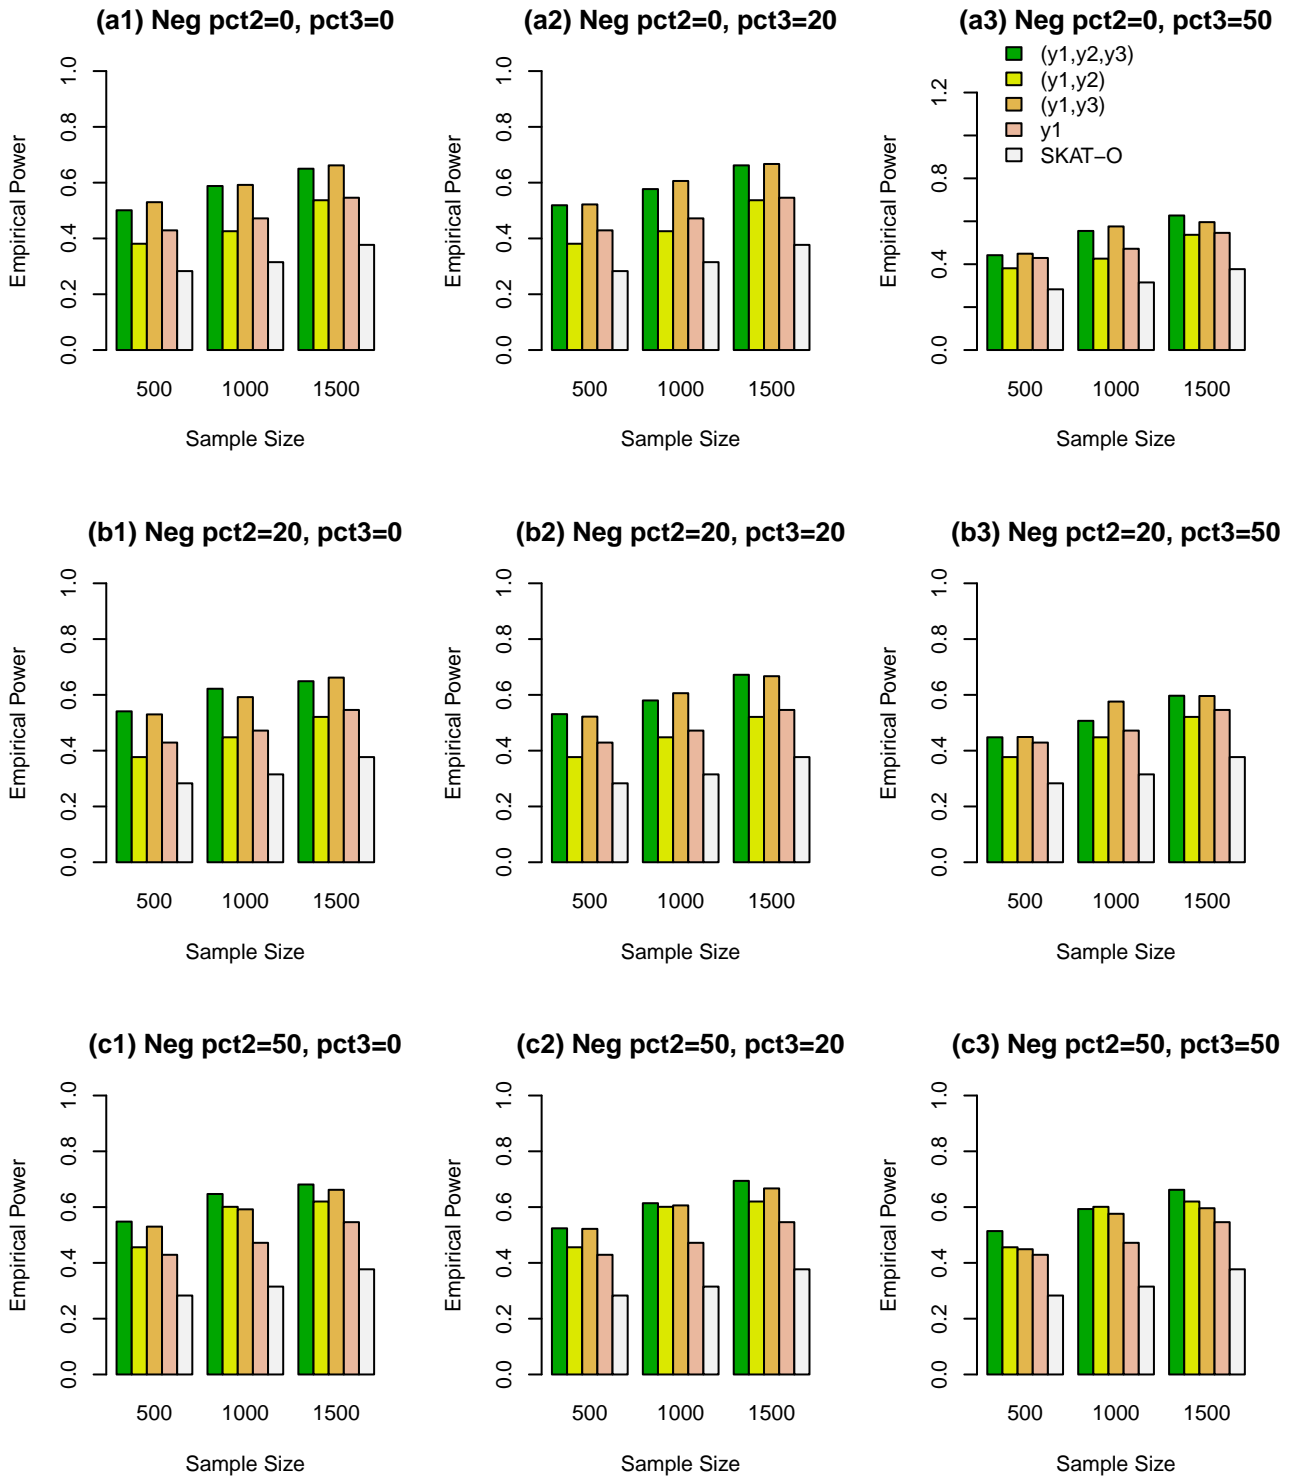

Figure S.2: The Empirical Power of the Approximate  $F$ -distribution Test of Model (3) Using B-spline Basis Based on Pillai-Bartlett Trace and SKAT-O at  $\alpha = 0.01$ , When Causal Variants Were Only Rare and 5% of the Variants Were Causal. For the trait  $y_1$ , all causal variants had positive effects; pct2 represents the percentage of negative effect causal variants for trait  $y_2$ ; and pct3 represents the percentage of negative effect causal variants for trait  $y_3$ .

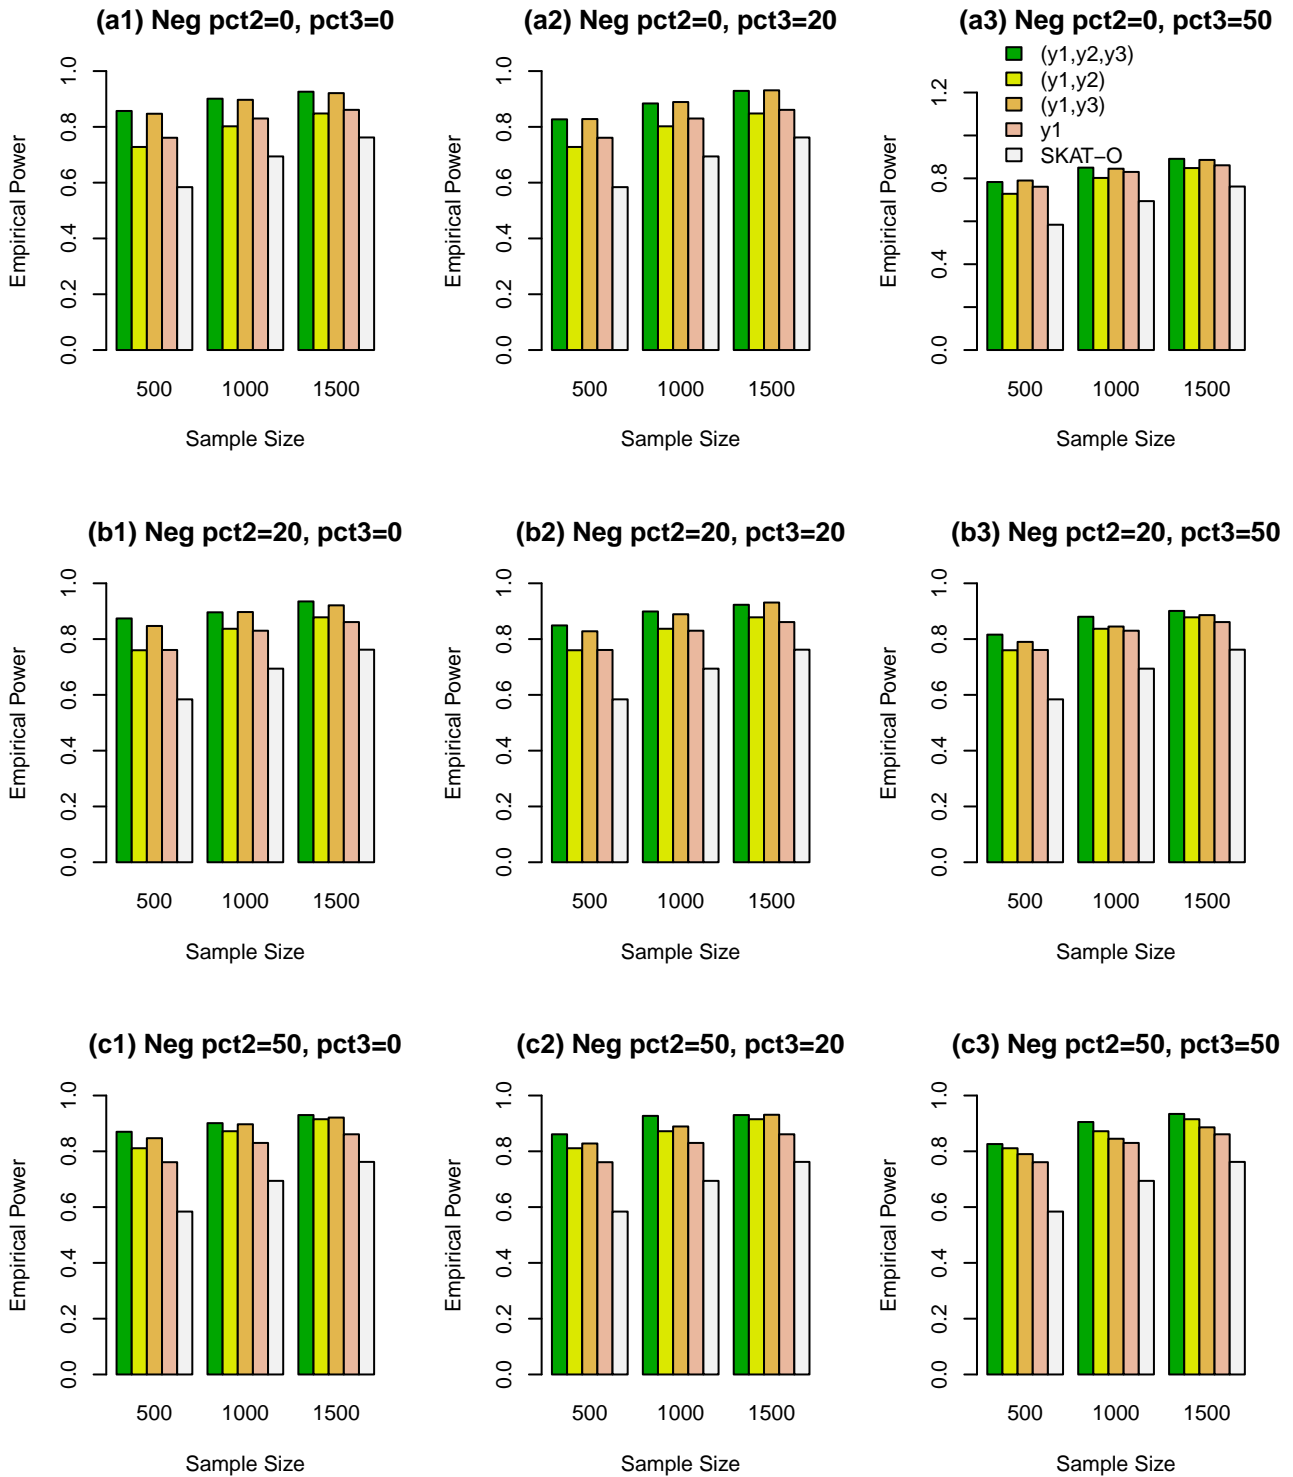

Figure S.3: The Empirical Power of the Approximate  $F$ -distribution Test of Model (3) Using B-spline Basis Based on Pillai-Bartlett Trace and SKAT-O at  $\alpha = 0.01$ , When Causal Variants Were Both Rare and Common and 10% of the Variants Were Causal. For the trait  $y_1$ , all causal variants had positive effects; pct2 represents the percentage of negative effect causal variants for trait  $y_2$ ; and pct3 represents the percentage of negative effect causal variants for trait  $y_3$ .

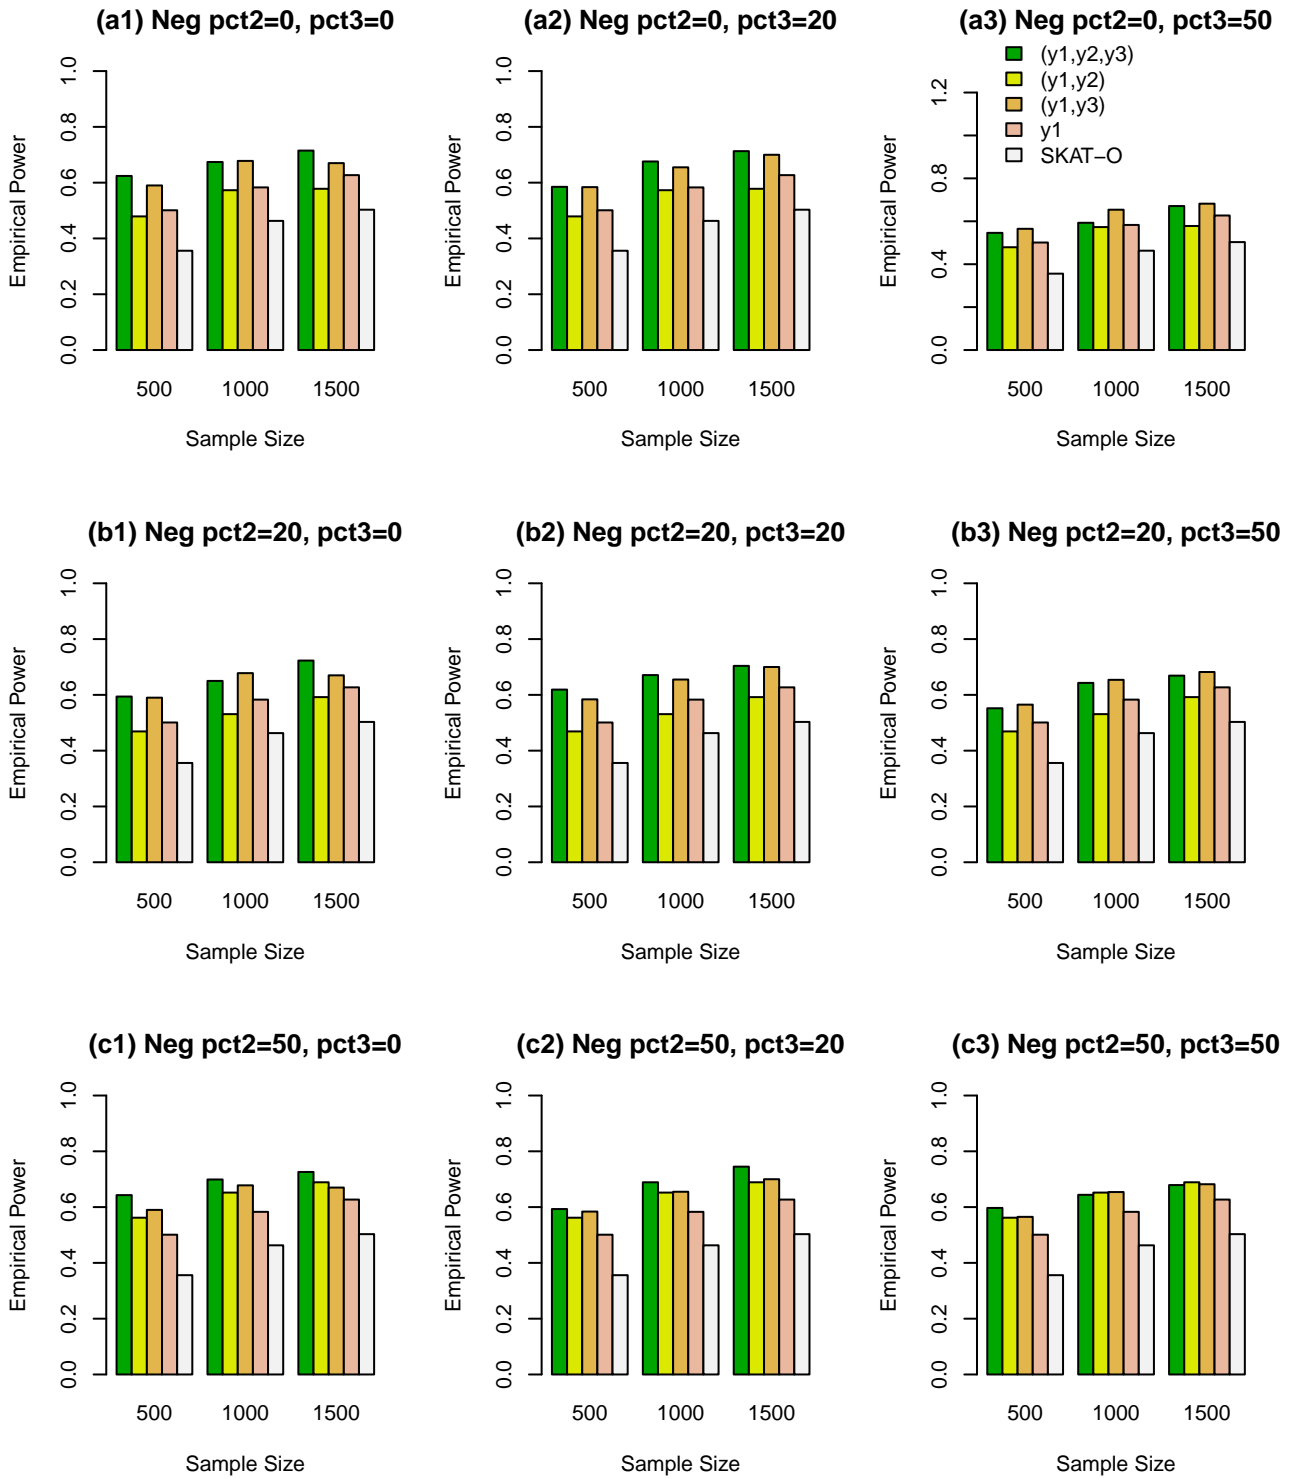

Figure S.4: The Empirical Power of the Approximate  $F$ -distribution Test of Model (3) Using B-spline Basis Based on Pillai-Bartlett Trace and SKAT-O at  $\alpha = 0.01$ , When Causal Variants Were Both Rare and Common and 5% of the Variants Were Causal. For the trait  $y_1$ , all causal variants had positive effects; pct2 represents the percentage of negative effect causal variants for trait  $y_2$ ; and pct3 represents the percentage of negative effect causal variants for trait  $y_3$ .

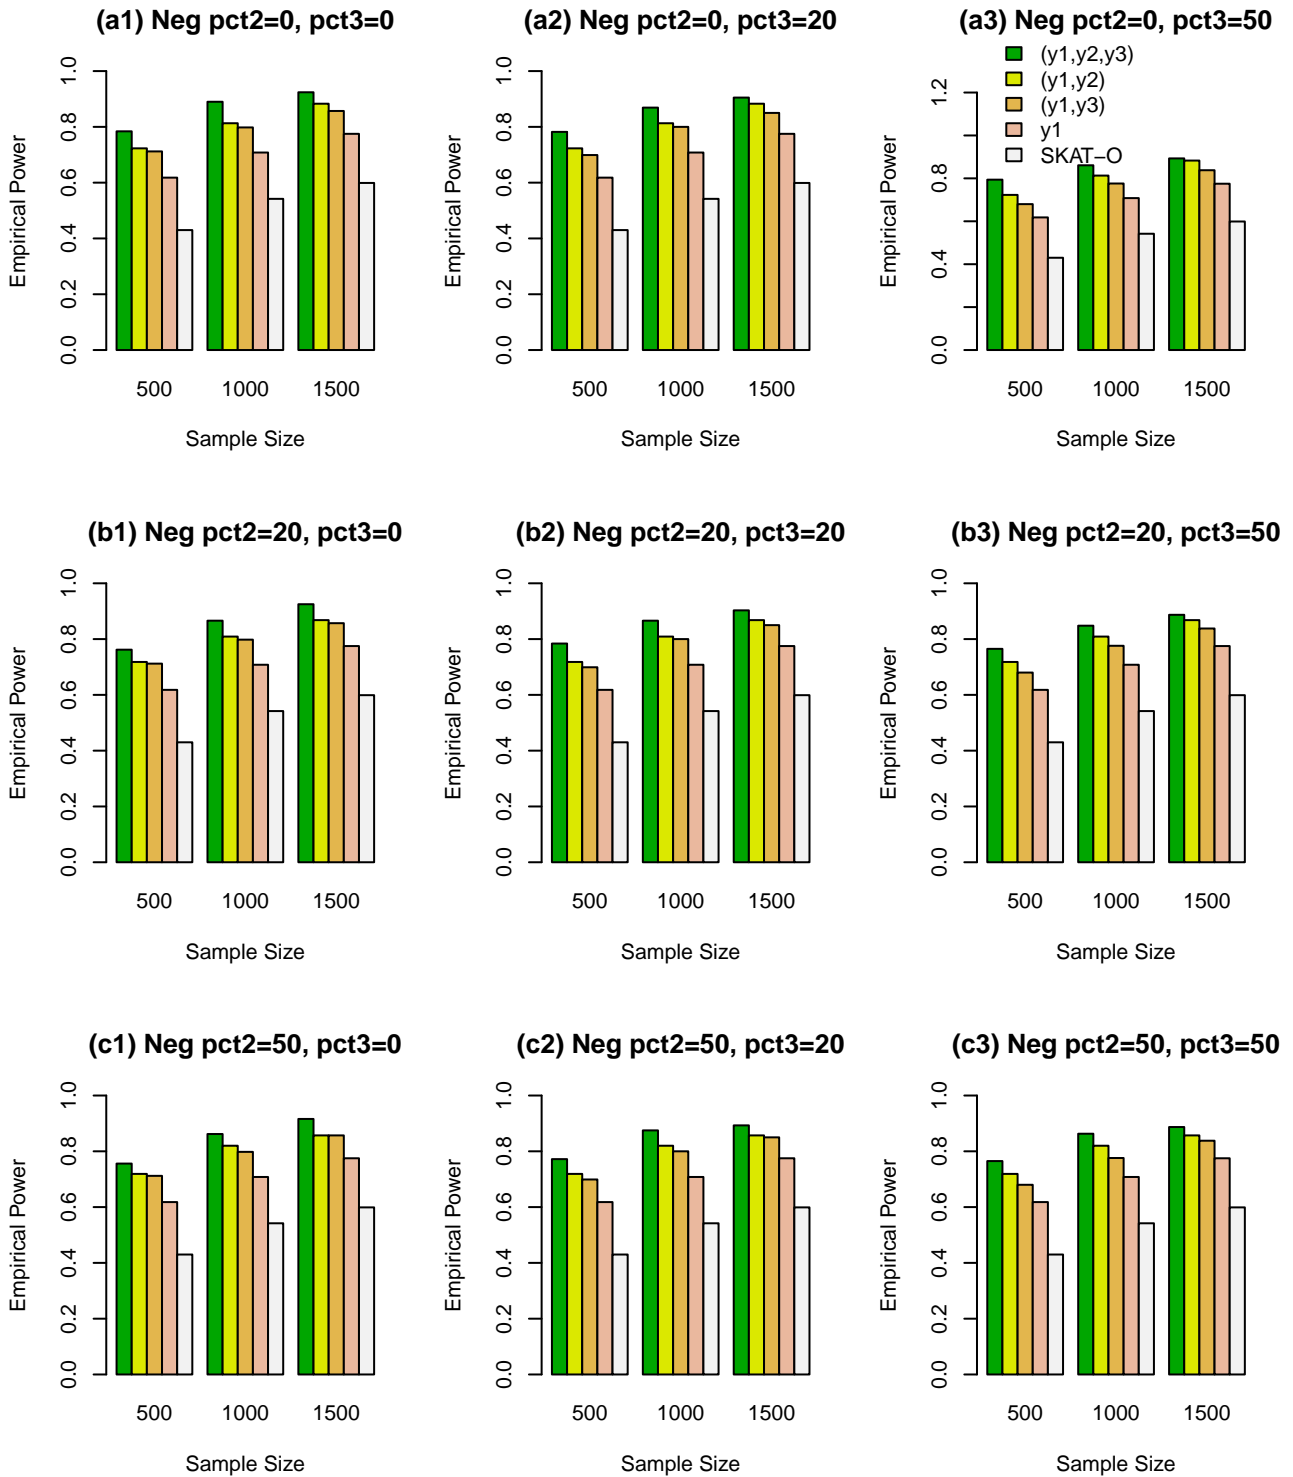

Figure S.5: The Empirical Power of the Approximate  $F$ -distribution Test of Model (3) Using B-spline Basis Based on Pillai-Bartlett Trace and SKAT-O at  $\alpha = 0.01$ , When Causal Variants Were Only Rare and 10% of the Variants Were Causal. For the trait  $y_1$ , 50%/50% causal variants had negative/positive effects; pct2 represents the percentage of negative effect causal variants for trait  $y_2$ ; and pct3 represents the percentage of negative effect causal variants for trait  $y_3$ .

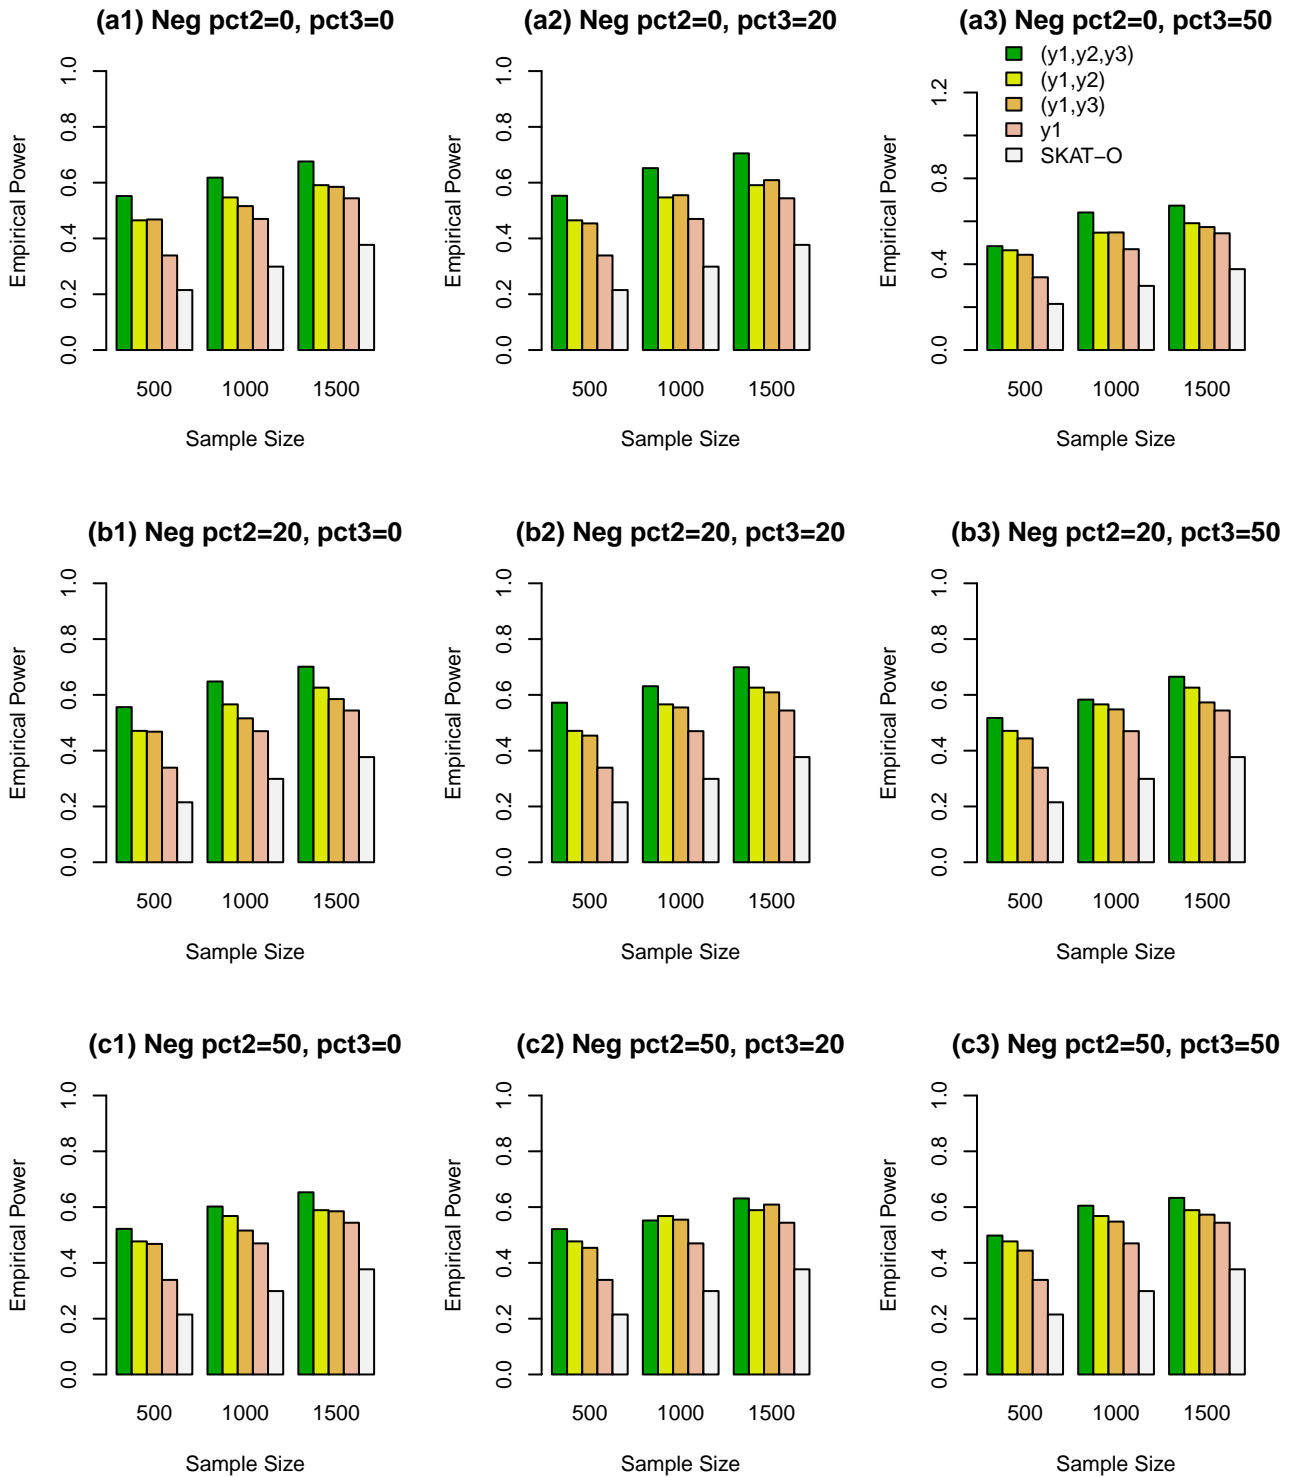

Figure S.6: The Empirical Power of the Approximate  $F$ -distribution Test of Model (3) Using B-spline Basis Based on Pillai-Bartlett Trace and SKAT-O at  $\alpha = 0.01$ , When Causal Variants Were Only Rare and 5% of the Variants Were Causal. For the trait  $y_1$ , 50%/50% causal variants had negative/positive effects; pct2 represents the percentage of negative effect causal variants for trait  $y_2$ ; and pct3 represents the percentage of negative effect causal variants for trait  $y_3$ .



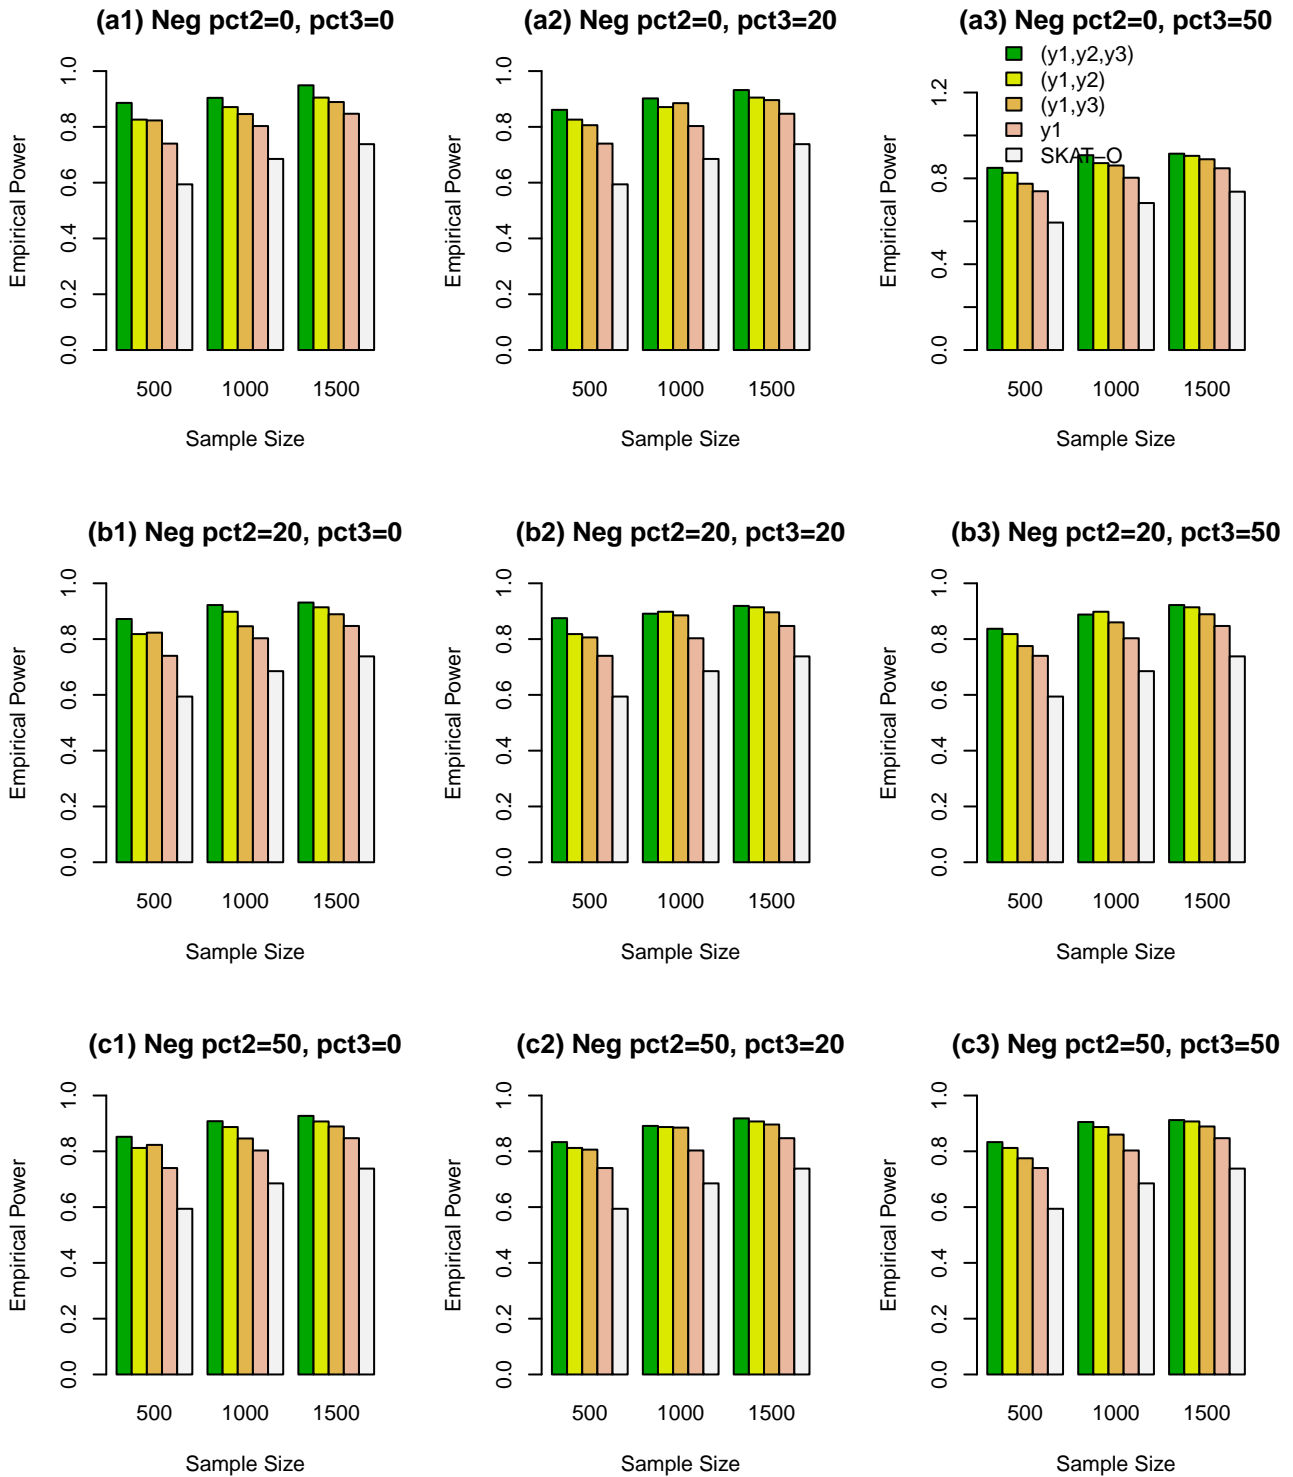

Figure S.7: The Empirical Power of the Approximate  $F$ -distribution Test of Model (3) Using B-spline Basis Based on Pillai-Bartlett Trace and SKAT-O at  $\alpha = 0.01$ , When Causal Variants Were Both Rare and Common and 10% of the Variants Were Causal. For the trait  $y_1$ , 50%/50% causal variants had negative/positive effects; pct2 represents the percentage of negative effect causal variants for trait  $y_2$ ; and pct3 represents the percentage of negative effect causal variants for trait  $y_3$ .

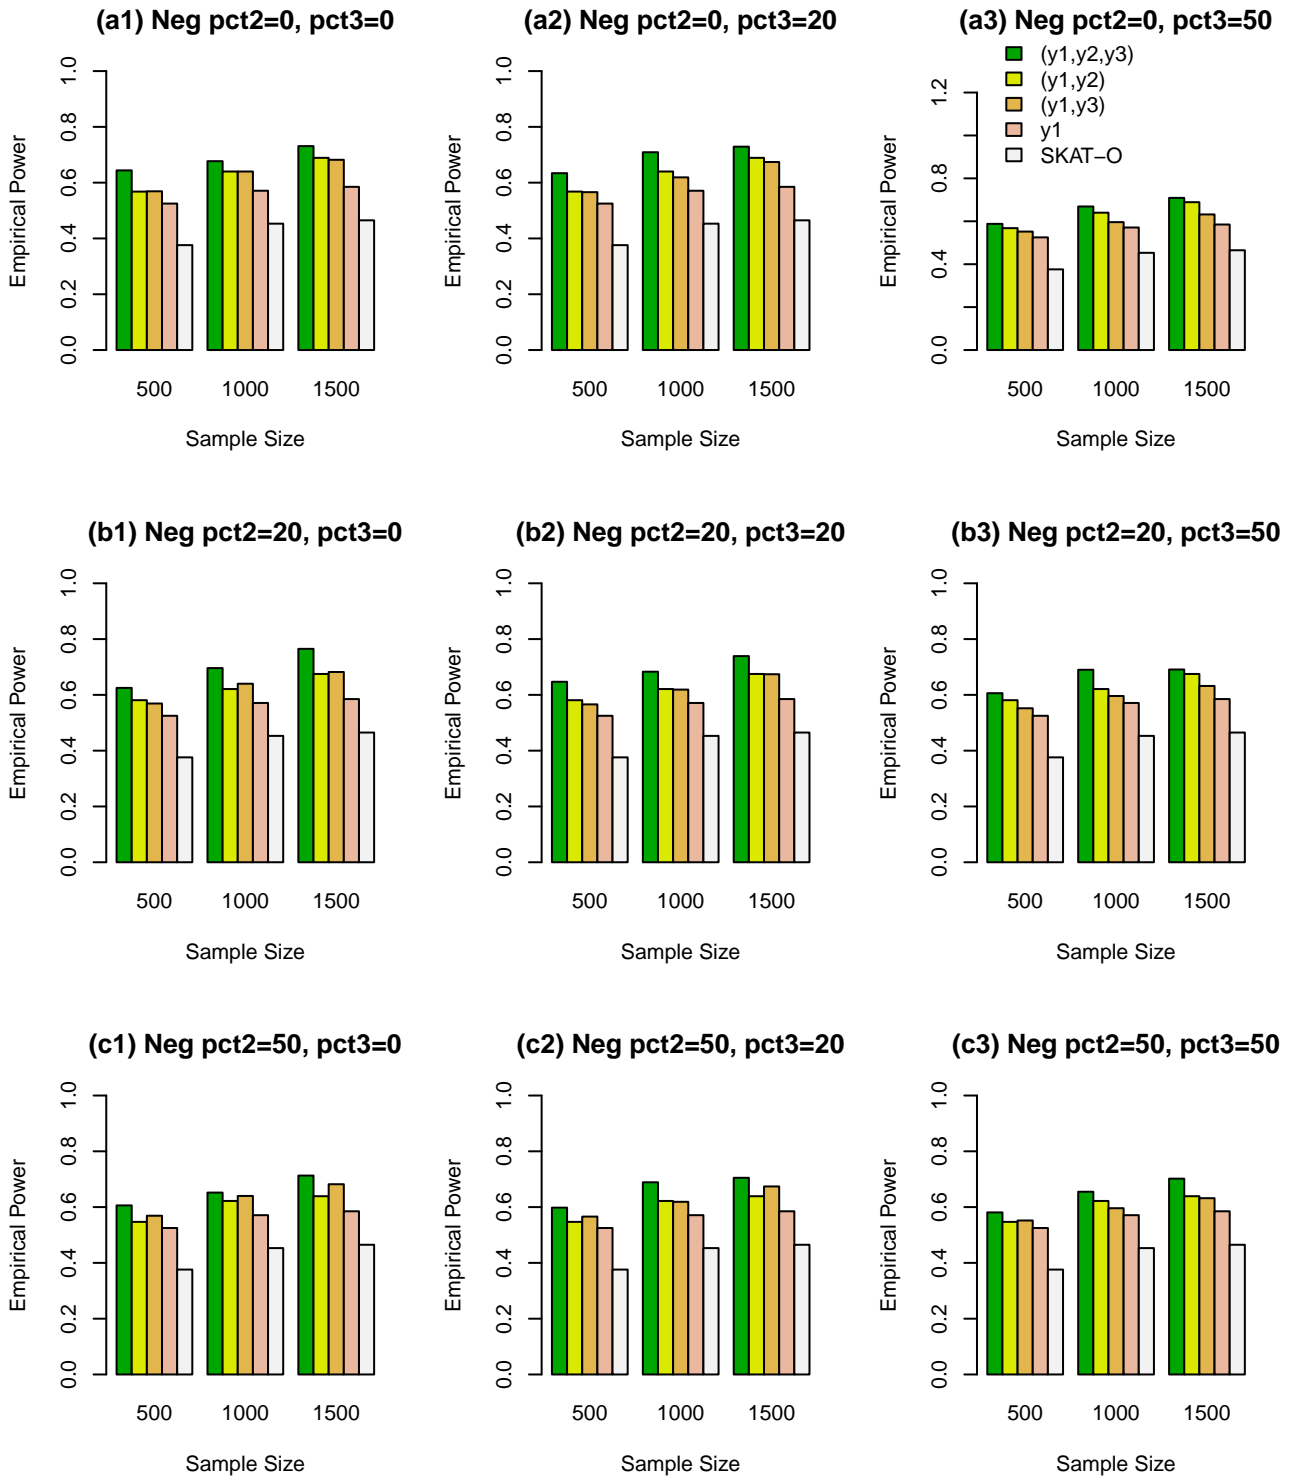

Figure S.8: The Empirical Power of the Approximate  $F$ -distribution Test of Model (3) Using B-spline Basis Based on Pillai-Bartlett Trace and SKAT-O at  $\alpha = 0.01$ , When Causal Variants Were Both Rare and Common and 5% of the Variants Were Causal. For the trait  $y_1$ , 50%/50% causal variants had negative/positive effects; pct2 represents the percentage of negative effect causal variants for trait  $y_2$ ; and pct3 represents the percentage of negative effect causal variants for trait  $y_3$ .
